# Supplementary material for: Microvascular Dysfunction Is Associated With Impaired Myocardial Work in Obstructive and Nonobstructive Hypertrophic Cardiomyopathy: A Multimodality Study
Source: PubMed Central journal article supplement — J Am Heart Assoc. 2023 Apr 17;12(8):e028857. doi: 10.1161/JAHA.122.028857 (PMC10227242; doi:10.1161/jaha.122.028857), 2023-04-17
Supplement: JAH3-12-e028857-s001.pdf [file JAH3-12-e028857-s001.pdf]

# **SUPPLEMENTAL MATERIAL**

## Supplemental Methods

### Data S1. Cardiac Magnetic Resonance acquisition protocol and analysis

All subjects underwent CMR performed on a 1.5T system (Sola, Siemens, Erlangen, Germany) and abstained from caffeine for at least 24 hours. Cardiac localizers were obtained to plan the cardiac axis views. Using Compressed Sensing-based sequence, cine images in 3 long-axis planes and sequential short-axis slices spanning the entire left ventricle from the base to the apex were acquired. Stress perfusion CMR 90 seconds after hyperemia was induced by regadenoson (400 mcg bolus) using 0.05 mmol/kg of gadolinium (Gadovist, Bayer Schering Pharma AG, Berlin, Germany) followed by 20ml saline flush injected at 5ml/s. Images were acquired apex to base during breath-hold at the first pass of contrast (60 measurements). A gradient echo sequence with a flip angle of  $12^\circ$ , bandwidth 651 Hz per pixel, nonsection-selective saturation preparation, field of view 380 mm, acquisition matrix 127x160, slice thickness 10 mm, and standard motion correction was used. LGE images were acquired 10–15 minutes after intravenous administration of additional 0.15 mmol/kg of gadolinium at end diastole, using a breath-held segmented inversion-recovery steady state free precession sequence with a flip angle of  $55^\circ$ , a field of view 400mm, and voxel size of 1.6x1.6x8.0mm after determining the optimal inversion time (TI) using a scout sequence. CMR interpretation was performed by one physician using commercially available software (CMR42, version 5.11, Circle Cardiovascular Imaging, Calgary, Alberta, Canada). LV wall thickness, LV mass, end diastolic volume (EDV), end systolic volume (ESV), and LV ejection fraction (EF) were measured from short axis cine images excluding papillary muscles and trabeculations. Microvascular dysfunction was considered present if a visual perfusion defect was observed. Perfusion defects were considered surrogates for ischemia. For perfusion assessment

and semi-quantification, the myocardium was divided into 32 subsegments (16 American Heart association segments subdivided into an endocardial and epicardial layer). Ischemic burden for each patient was calculated based on the number of involved sub-segments, assigning 3% of myocardium to each sub-segment. Each segment was analyzed for the presence or absence of perfusion defect. Artifacts were assessed by using motion correction in the perfusion sequence and perfusion defects were required to persist for three or more beats throughout the stress perfusion sequence. Perfusion defects sparing the subendocardium and coincident with LGE were not considered, as subendocardial involvement is mandatory for microvascular dysfunction defects. The LGE was analyzed per-segment basis using a signal threshold versus reference myocardium of  $\geq 6$  standard deviation. Total LGE was expressed as a proportion of LV mass.

**Table S1.** Univariable linear regression analysis of left ventricular myocardial work parameters

|                                 | Correlation Coefficient (r) | p-value          | $\beta$ -estimate | 95% confidence interval | p-value          |
|---------------------------------|-----------------------------|------------------|-------------------|-------------------------|------------------|
| <b>Global Work Index</b>        |                             |                  |                   |                         |                  |
| N. segments ischemia (n)        | -0.532                      | <b>&lt;0.001</b> | -56.465           | -78.163 to -34.767      | <b>&lt;0.001</b> |
| Ischemia burden (% of LV mass)  | -0.519                      | <b>&lt;0.001</b> | -12.667           | -17.778 to -7.554       | <b>&lt;0.001</b> |
| MWT                             | -0.471                      | <b>&lt;0.001</b> | -45.357           | -66.554 to -24.160      | <b>&lt;0.001</b> |
| LV mass index                   | -0.558                      | <b>&lt;0.001</b> | -7.319            | -10.163 to -4.476       | <b>&lt;0.001</b> |
| Concentric hypertrophy pattern  | -0.257                      | <b>0.028</b>     | -372.156          | -701.390 to -42.922     | <b>0.027</b>     |
| N. segments LGE (n)             | -0.331                      | <b>0.005</b>     | -29.263           | -50.427 to -8.100       | <b>0.007</b>     |
| LGE (% of LV mass)              | -0.285                      | <b>0.015</b>     | -15.058           | -26.234 to -3.882       | <b>0.009</b>     |
| Obstructive HCM                 | -0.163                      | 0.169            | -136.897          | -359.551 to -85.757     | 0.224            |
| Diabetes                        | -0.246                      | <b>0.036</b>     | -290.443          | -562.397 to -18.489     | <b>0.037</b>     |
| Hypertension                    | -0.059                      | 0.619            | -45.352           | -245.780 to 155.076     | 0.653            |
| BMI >25 kg/m <sup>2</sup>       | -0.031                      | 0.868            | -60.464           | -576.600 to 455.672     | 0.813            |
| Male sex                        | -0.040                      | 0.737            | -28.073           | -237.522 to 181.376     | 0.790            |
| <b>Global Constructive Work</b> |                             |                  |                   |                         |                  |
| N. segments ischemia (n)        | -0.519                      | <b>&lt;0.001</b> | -59.373           | -80.971 to -37.774      | <b>&lt;0.001</b> |
| Ischemia burden (% of LV mass)  | -0.532                      | <b>&lt;0.001</b> | -13.788           | -18.798 to -8.778       | <b>&lt;0.001</b> |
| MWT                             | -0.504                      | <b>&lt;0.001</b> | -47.400           | -68.319 to -26.482      | <b>&lt;0.001</b> |
| LV mass index                   | -0.616                      | <b>&lt;0.001</b> | -8.193            | -10.885 to -5.501       | <b>&lt;0.001</b> |
| Concentric hypertrophy pattern  | -0.321                      | <b>0.006</b>     | -447.802          | -771.116 to -124.489    | <b>0.007</b>     |
| N. segments LGE (n)             | -0.404                      | <b>&lt;0.001</b> | -37.389           | -57.919 to -16.859      | <b>0.001</b>     |
| LGE (% of LV mass)              | -0.372                      | <b>0.001</b>     | -17.782           | -28.693 to -6.872       | <b>0.002</b>     |
| Obstructive HCM                 | -0.105                      | 0.379            | -114.085          | -337.643 to 109.474     | 0.312            |
| Diabetes                        | -0.201                      | 0.091            | -248.689          | -522.722 to 25.345      | 0.075            |
| Hypertension                    | -0.032                      | 0.789            | -2.722            | -204.462 to 199.018     | 0.979            |
| BMI >25 kg/m <sup>2</sup>       | -0.061                      | 0.738            | -20.286           | -542.004 to 501.433     | 0.937            |
| Male sex                        | -0.115                      | 0.337            | -72.659           | -281.949 to 136.632     | 0.491            |
| <b>Global Wasted Work</b>       |                             |                  |                   |                         |                  |
| N. segments ischemia (n)        | 0.280                       | <b>0.017</b>     | 5.463             | 1.902 to 9.024          | <b>0.014</b>     |
| Ischemia burden (% of LV mass)  | 0.199                       | 0.094            | 0.711             | -1.016 to 2.438         | 0.415            |
| MWT                             | 0.210                       | 0.076            | 4.245             | -2.566 to 11.057        | 0.218            |
| LV mass index                   | 0.258                       | <b>0.029</b>     | 0.584             | -0.369 to 1.537         | 0.226            |
| Concentric hypertrophy pattern  | 0.118                       | 0.322            | 35.833            | -62.410-134.076         | 0.469            |
| N. segments LGE (n)             | 0.153                       | 0.203            | 1.919             | -4.705 to 8.543         | 0.565            |
| LGE (% of LV mass)              | 0.018                       | 0.881            | 0.269             | -3.202 to 3.740         | 0.877            |
| Obstructive HCM                 | 0.066                       | 0.584            | 19.423            | -45.639 to 84.485       | 0.553            |
| Diabetes                        | 0.231                       | 0.051            | 82.361            | 3.565 to 161.156        | <b>0.041</b>     |
| Hypertension                    | 0.239                       | <b>0.043</b>     | 67.500            | 11.329 to 123.671       | <b>0.019</b>     |
| BMI >25 kg/m <sup>2</sup>       | 0.338                       | 0.059            | 75.357            | -38.855 to 189.569      | 0.188            |
| Male sex                        | -0.110                      | 0.358            | -44.321           | -104.221 to 15.579      | 0.145            |
| <b>Global Work Efficiency</b>   |                             |                  |                   |                         |                  |
| N. segments ischemia (n)        | -0.477                      | <b>&lt;0.001</b> | -0.833            | -1.244 to -0.422        | <b>&lt;0.001</b> |

|                                |        |                  |        |                   |                  |
|--------------------------------|--------|------------------|--------|-------------------|------------------|
| Ischemia burden (% of LV mass) | -0.379 | <b>0.001</b>     | -0.156 | -0.255 to -0.057  | <b>0.003</b>     |
| MWT                            | -0.361 | <b>0.002</b>     | -0.530 | -0.931 to -0.130  | <b>0.010</b>     |
| LV mass index                  | -0.459 | <b>&lt;0.001</b> | -0.101 | -0.155 to -0.048  | <b>&lt;0.001</b> |
| Concentric hypertrophy pattern | -0.200 | 0.092            | -6.138 | -11.975 to -0.302 | <b>0.040</b>     |
| N. segments LGE (n)            | -0.263 | <b>0.026</b>     | -0.376 | -0.765 to 0.014   | 0.058            |
| LGE (% of LV mass)             | -0.161 | 0.180            | -0.158 | -0.363 to 0.048   | 0.130            |
| Obstructive HCM                | -0.193 | 0.105            | -2.758 | -6.683 to 1.167   | 0.166            |
| Diabetes                       | -0.323 | <b>0.006</b>     | -7.185 | -11.834 to -2.536 | <b>0.003</b>     |
| Hypertension                   | -0.181 | 0.127            | -2.861 | -6.360 to 0.638   | 0.107            |
| BMI >25 kg/m <sup>2</sup>      | -0.313 | 0.081            | -6.286 | -15.313 to 2.742  | 0.165            |
| Male sex                       | 0.059  | 0.625            | 2.052  | -1.627 to 5.731   | 0.270            |

p-values were obtained by mixed effects regression models.

LV: left ventricular, MWT: maximal wall thickness, LGE: late gadolinium enhancement, HCM: hypertrophic cardiomyopathy, BMI: body mass index

**Table S2.** Correlation between myocardial work parameters and ischemia according to obstructive hypertrophic cardiomyopathy (HCM) versus nonobstructive HCM

|                                 | Obstructive HCM (n=21)      |                  | Nonobstructive HCM (n=54)   |                  | p-value (interaction) |
|---------------------------------|-----------------------------|------------------|-----------------------------|------------------|-----------------------|
|                                 | Correlation Coefficient (r) | p-value          | Correlation Coefficient (r) | p-value          |                       |
| Perfusion defects               |                             |                  |                             |                  |                       |
| <b>Global Work Index</b>        |                             |                  |                             |                  |                       |
| N. segments (n)                 | -0.518                      | <b>0.019</b>     | -0.506                      | <b>&lt;0.001</b> | 0.953                 |
| Ischemia burden (% of LV mass)  | -0.524                      | <b>&lt;0.001</b> | -0.414                      | 0.071            | 0.606                 |
| <b>Global Constructive Work</b> |                             |                  |                             |                  |                       |
| N. segments (n)                 | -0.564                      | <b>0.010</b>     | -0.520                      | <b>&lt;0.001</b> | 0.816                 |
| Ischemia burden (% of LV mass)  | -0.524                      | <b>&lt;0.001</b> | -0.420                      | 0.065            | 0.625                 |
| <b>Global Wasted Work</b>       |                             |                  |                             |                  |                       |
| N. segments (n)                 | 0.158                       | 0.506            | 0.190                       | 0.178            | 0.904                 |
| Ischemia burden (% of LV mass)  | 0.155                       | 0.514            | 0.298                       | <b>0.032</b>     | 0.582                 |
| <b>Global Work Efficiency</b>   |                             |                  |                             |                  |                       |
| N. segments (n)                 | -0.591                      | <b>0.006</b>     | -0.317                      | <b>0.022</b>     | 0.201                 |
| Ischemia burden (% of LV mass)  | -0.484                      | <b>0.030</b>     | -0.409                      | <b>0.003</b>     | 0.732                 |

HCM: hypertrophic cardiomyopathy, LV: left ventricular

**Table S3.** Correlation between myocardial work parameters and ischemia according to the presence of significant replacement fibrosis (LGE  $\geq 15\%$  versus LGE  $< 15\%$ )

|                                 | LGE $\geq 15\%$ (n=29)      |              | LGE $< 15\%$ (n=45)         |              |                       |
|---------------------------------|-----------------------------|--------------|-----------------------------|--------------|-----------------------|
| Perfusion defects               | Correlation Coefficient (r) | p-value      | Correlation Coefficient (r) | p-value      | p-value (interaction) |
| <b>Global Work Index</b>        |                             |              |                             |              |                       |
| N. segments (n)                 | -0.489                      | <b>0.007</b> | -0.393                      | <b>0.009</b> | 0.632                 |
| Ischemia burden (% of LV mass)  | -0.472                      | <b>0.010</b> | -0.471                      | <b>0.001</b> | 0.995                 |
| <b>Global Constructive Work</b> |                             |              |                             |              |                       |
| N. segments (n)                 | -0.455                      | <b>0.013</b> | -0.359                      | <b>0.019</b> | 0.643                 |
| Ischemia burden (% of LV mass)  | -0.431                      | <b>0.019</b> | -0.408                      | <b>0.007</b> | 0.911                 |
| <b>Global Wasted Work</b>       |                             |              |                             |              |                       |
| N. segments (n)                 | 0.218                       | 0.165        | 0.124                       | 0.520        | 0.697                 |
| Ischemia burden (% of LV mass)  | 0.317                       | <b>0.040</b> | 0.209                       | 0.277        | 0.640                 |
| <b>Global Work Efficiency</b>   |                             |              |                             |              |                       |
| N. segments (n)                 | -0.351                      | <b>0.022</b> | -0.303                      | 0.110        | 0.829                 |
| Ischemia burden (% of LV mass)  | -0.474                      | <b>0.002</b> | -0.362                      | 0.054        | 0.584                 |

LGE: late gadolinium enhancement, LV: left ventricular

**Table S4.** Segmental univariable linear ventricular regression analysis of left myocardial work parameters.

|                               | Correlation Coefficient (r) | p-value          | $\beta$ -estimate | 95% confidence interval | p-value          |
|-------------------------------|-----------------------------|------------------|-------------------|-------------------------|------------------|
| <b>Global Work Index</b>      |                             |                  |                   |                         |                  |
| Perfusion defect              | -0.294                      | <b>&lt;0.001</b> | -415.325          | -502.732 to -327.918    | <b>&lt;0.001</b> |
| LGE                           | -0.227                      | <b>&lt;0.001</b> | -320.131          | -405.665 to -234.597    | <b>&lt;0.001</b> |
| Wall thickness $\geq$ 15 mm   | -0.422                      | <b>&lt;0.001</b> | -52.975           | -60.801 to -45.148      | <b>&lt;0.001</b> |
| Wall thickness 12-14 mm       | -0.289                      | <b>&lt;0.001</b> | -85.948           | -105.501 to -66.395     | <b>&lt;0.001</b> |
| Obstructive HCM               | —                           | —                | -158.461          | -250.316 to -66.606     | <b>0.001</b>     |
| Diabetes                      | —                           | —                | -146.564          | -259.618 to -33.511     | <b>0.011</b>     |
| Hypertension                  | —                           | —                | -63.451           | -146.639 to 19.737      | 0.135            |
| BMI $>25$ kg/m <sup>2</sup>   | —                           | —                | -77.494           | -176.738 to 21.751      | 0.126            |
| Male sex                      | —                           | —                | -76.704           | -162.193 to 8.784       | 0.079            |
| <b>Global Work Efficiency</b> |                             |                  |                   |                         |                  |
| Perfusion defect              | -0.242                      | <b>&lt;0.001</b> | -5.635            | -7.723 to -3.548        | <b>&lt;0.001</b> |
| LGE                           | -0.133                      | <b>&lt;0.001</b> | -4.408            | -6.400 to -2.417        | <b>&lt;0.001</b> |
| Wall thickness $\geq$ 15 mm   | -0.233                      | <b>&lt;0.001</b> | -0.630            | -0.821 to -0.438        | <b>&lt;0.001</b> |
| Wall thickness 12-14 mm       | -0.174                      | <b>&lt;0.001</b> | -0.905            | -1.331 to -0.478        | <b>&lt;0.001</b> |
| Obstructive HCM               | —                           | —                | -3.251            | -5.273 to -1.229        | <b>0.002</b>     |
| Diabetes                      | —                           | —                | -5.744            | -8.318 to -3.171        | <b>&lt;0.001</b> |
| Hypertension                  | —                           | —                | -2.874            | -4.745 to -1.003        | <b>0.003</b>     |
| BMI $>25$ kg/m <sup>2</sup>   | —                           | —                | -1.469            | -3.749 to 0.810         | 0.206            |
| Male sex                      | —                           | —                | -0.050            | -1.972 to 1.871         | 0.959            |

LGE: late gadolinium enhancement, HCM: hypertrophic cardiomyopathy, BMI: body mass index



**Figure S1.** Receiver operating characteristic (ROC) curve of the association between Global Work Index and the presence of perfusion defects

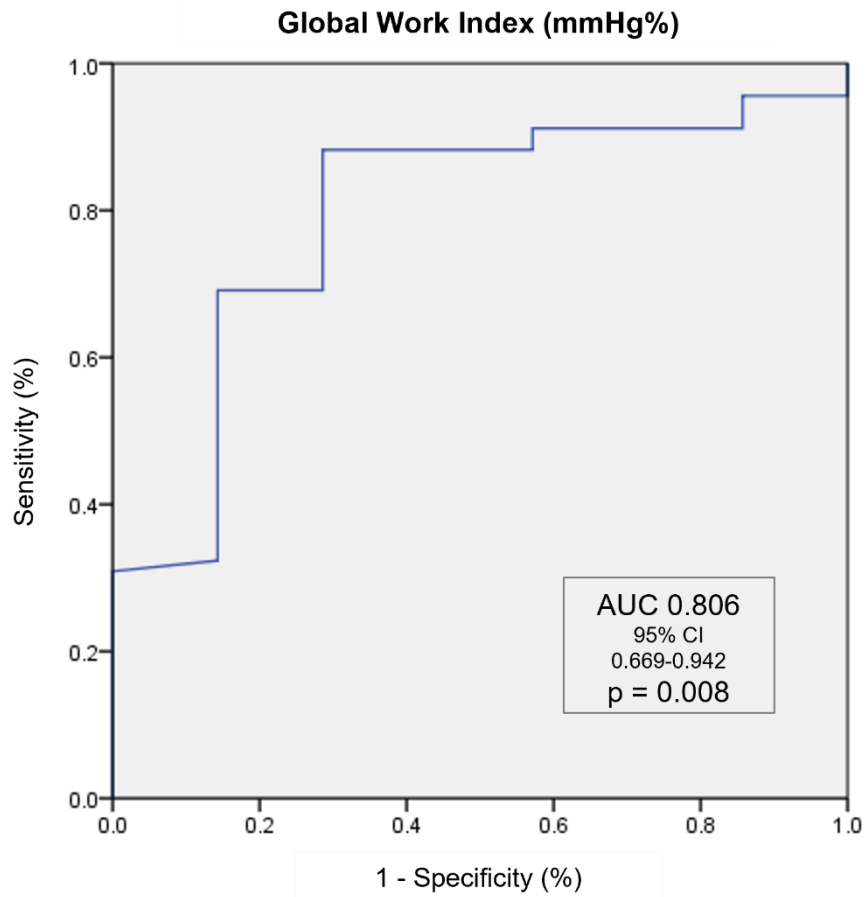

**Figure S2.** Correlation between myocardial work parameters and ischemia according to obstructive hypertrophic cardiomyopathy (HCM) versus nonobstructive HCM

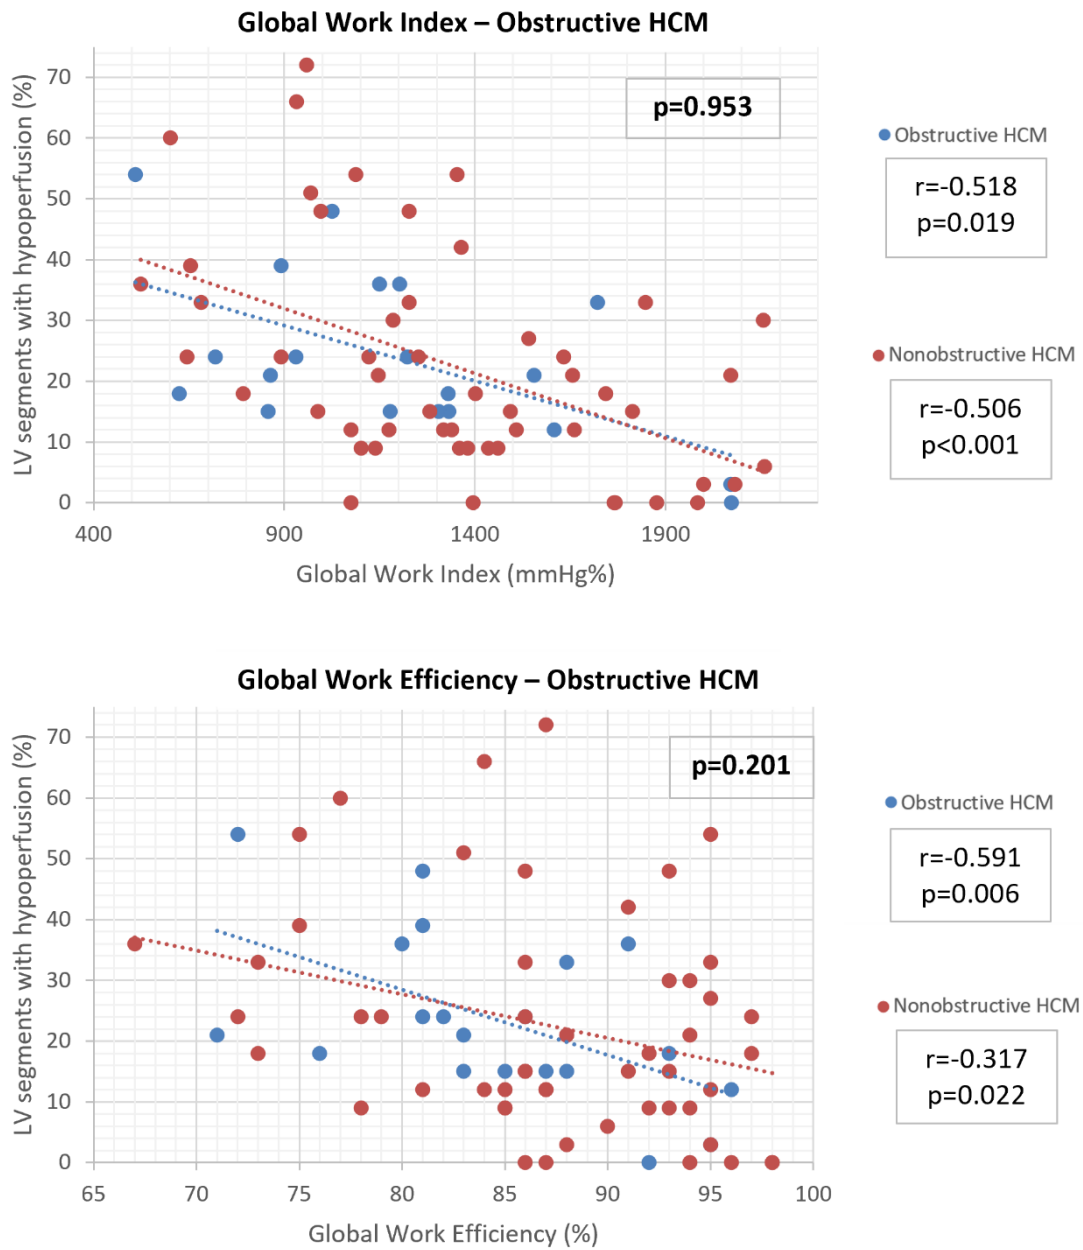

**Figure S3.** Correlation between myocardial work parameters and ischemia according to the presence of significant replacement fibrosis (late gadolinium enhancement [LGE]  $\geq 15\%$  vs LGE  $< 15\%$ ).

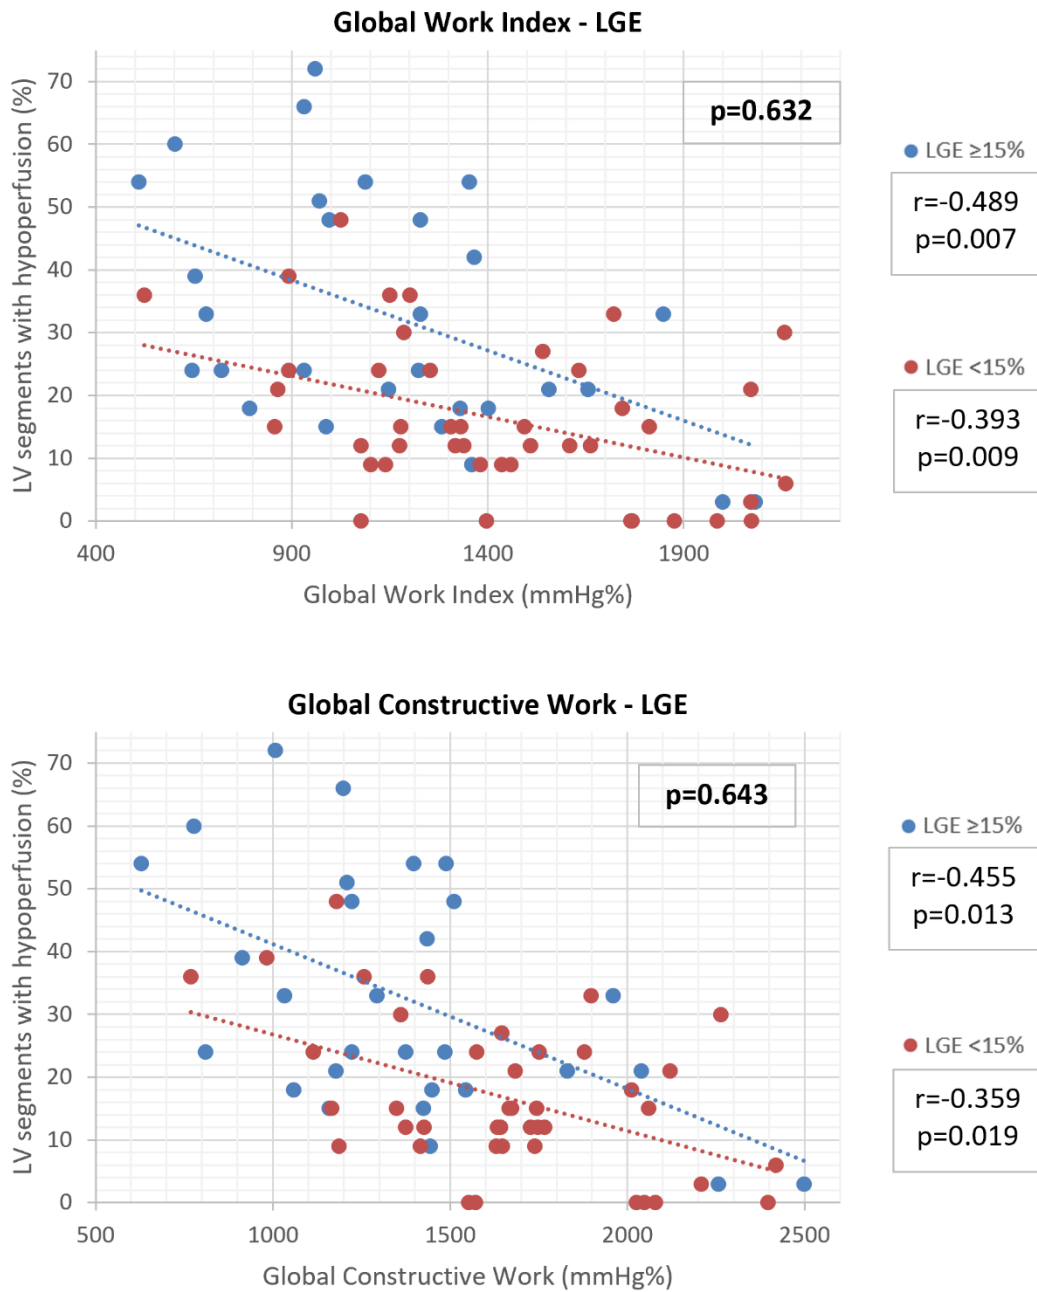

LGE: late gadolinium enhancement
